# Supplementary material
Source: MDPI journal article supplement (https://www.mdpi.com/1424-2818/14/8/666)
Supplement: s1 [file s1]

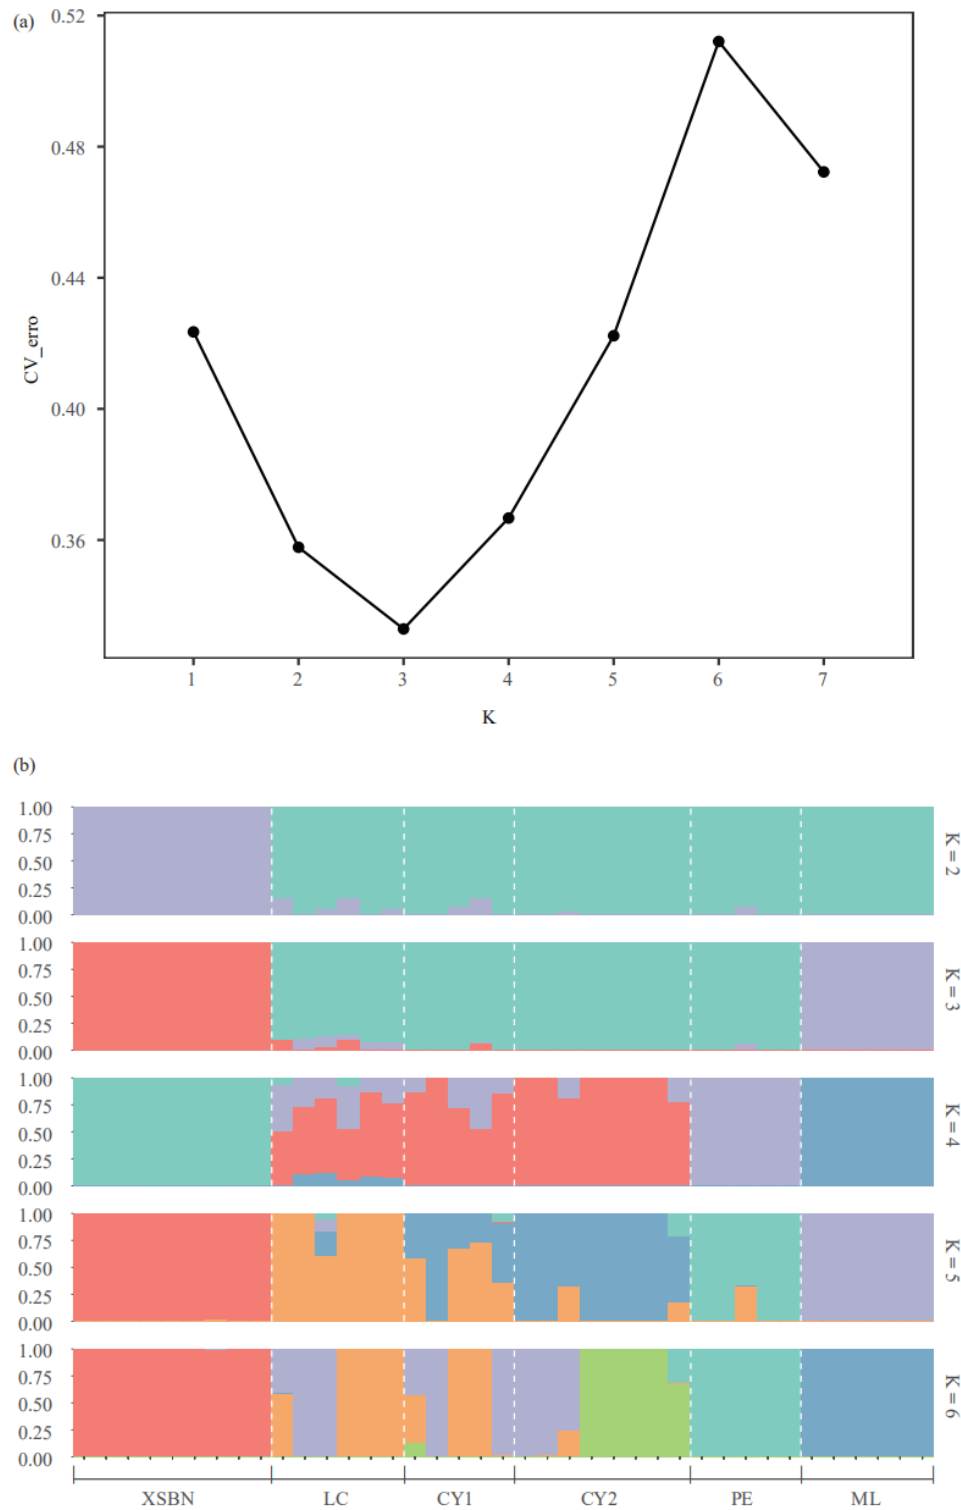

**Figure S1.** The results of cross-validation error (a) and ancestry composition when K=2 to K=6 in Admixture analysis (b).

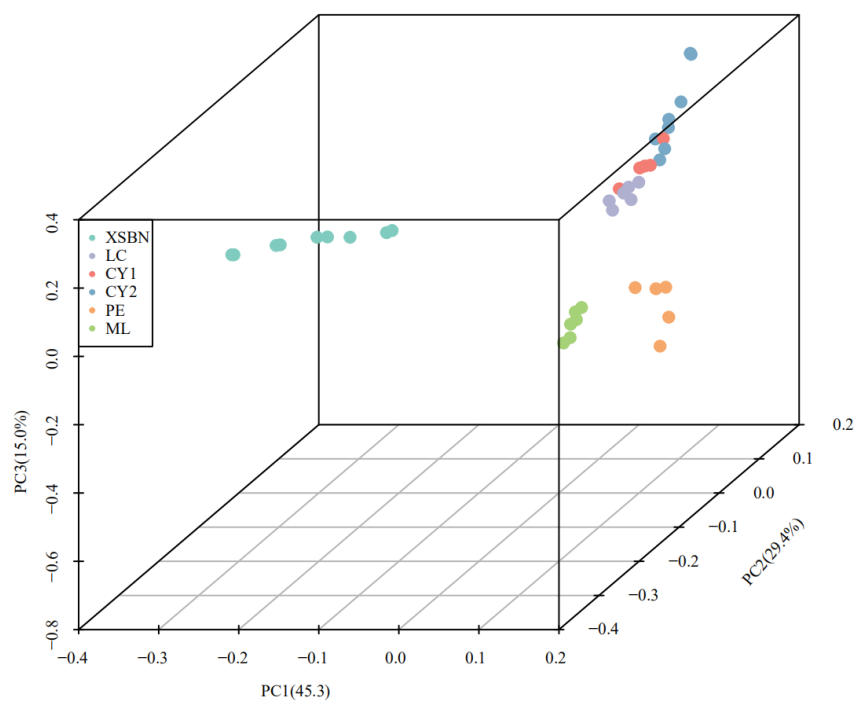

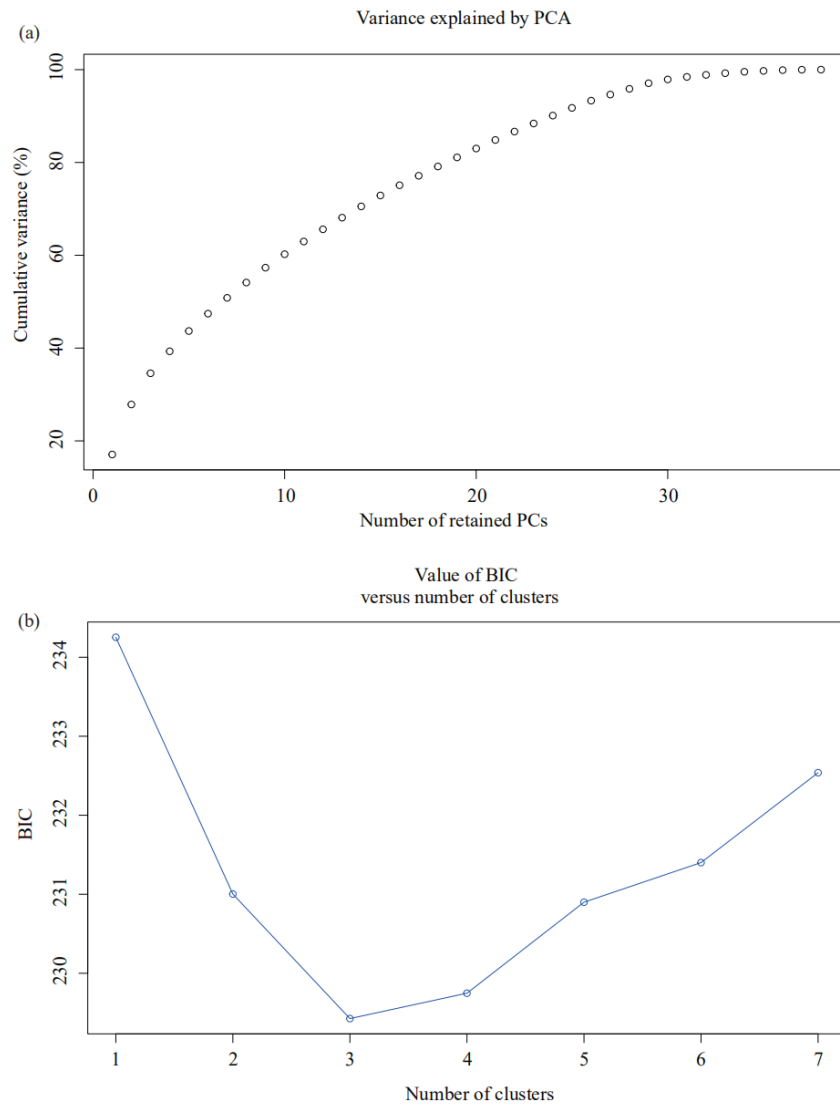

**Figure S3.** Variance explained by PCA eigenvalues (a) and optimal K-value results based on BIC (b) in DAPC analysis

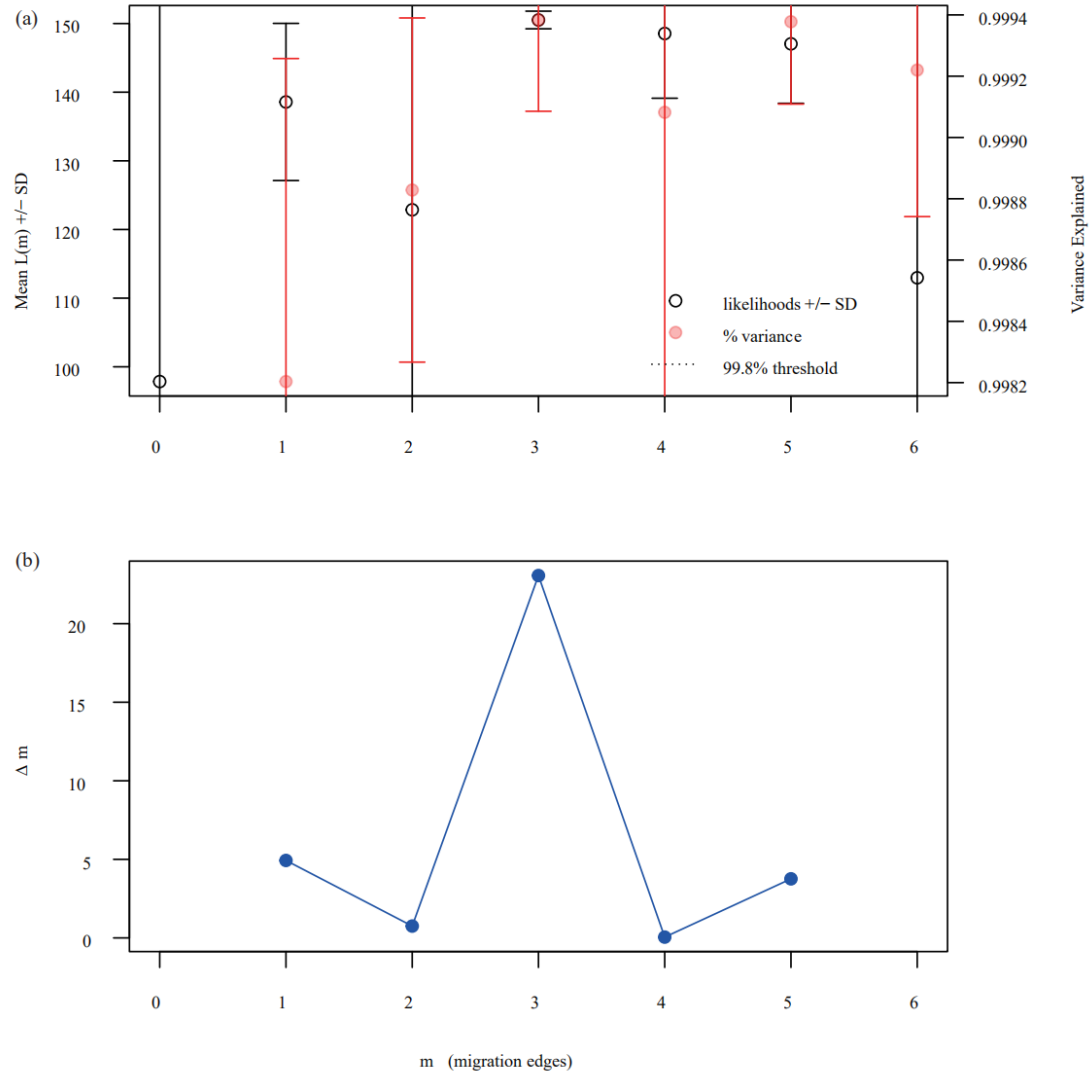

**Figure S4.** *OptM* results for TreeMix when run from 0 - 6 migration event(s). (a) Shows the mean and standard deviation and the proportion of variance explained (red circles) over 10 iterations of the likelihood  $L(m)$  (black circles) for each migration events, with the 99.8% threshold is that recommended by Pickrell and Pritchard [56], but not visible here because the threshold is already met before  $m = 1$  edges. (b) Shows  $\Delta M$ , which shows the fitted migration events is 3.

**Table S1.** Three-population test for *T. doichangensis*

| Population Configuration | f3      | Standard error | Z-score  |
|--------------------------|---------|----------------|----------|
| LC; XSBN, CY2            | -0.0017 | 0.0004         | -4.5426  |
| CY1; XSBN, CY2           | -0.0050 | 0.0004         | -11.9257 |
| CY1; LC, CY2             | -0.0037 | 0.0004         | -9.4232  |
| CY1; CY2, PE             | -0.0040 | 0.0004         | -10.7353 |
| CY1; CY2, ML             | -0.0029 | 0.0006         | -4.5153  |

Note: We performed f3-statistics (C; A, B) on all possible populations. Listed are at least one negative f3-score and Z-score less than -3; mixed populations C are those with significantly negative f3-statistics, not necessarily populations that were actually mixed historically.

**Table S2.** Four-population test for *T. doichangensis*

| Population Configuration | f4      | Standard error | Z-score  |
|--------------------------|---------|----------------|----------|
| XSBN, CY1; LC, CY2       | 0.0062  | 0.0008         | 7.7825   |
| XSBN, CY2; LC, CY1       | 0.0049  | 0.0007         | 7.1827   |
| XSBN, PE; LC, CY2        | 0.0022  | 0.0006         | 3.7944   |
| XSBN, ML; LC, CY2        | 0.0021  | 0.0007         | 3.1603   |
| XSBN, ML; LC, PE         | 0.0028  | 0.0006         | 4.8838   |
| XSBN, ML; CY1, CY2       | 0.0021  | 0.0007         | 3.1919   |
| XSBN, ML; CY1, PE        | 0.0028  | 0.0007         | 4.1368   |
| LC, ML; CY1, PE          | 0.0026  | 0.0008         | 3.4206   |
| LC, PE; CY2, ML          | 0.0017  | 0.0004         | 4.1593   |
| CY1, ML; CY2, PE         | 0.0054  | 0.0009         | 5.8693   |
| CY1, PE; CY2, ML         | 0.0066  | 0.0005         | 12.0499  |
| XSBN, LC; CY2, ML        | -0.0032 | 0.0007         | -4.8847  |
| XSBN, LC; PE, ML         | -0.0022 | 0.0006         | -3.4128  |
| XSBN, CY1; CY2, PE       | -0.0047 | 0.0005         | -10.1789 |
| XSBN, CY1; CY2, ML       | -0.0081 | 0.0008         | -10.2276 |
| XSBN, CY1; PE, ML        | -0.0034 | 0.0010         | -3.3953  |
| XSBN, CY2; CY1, PE       | -0.0038 | 0.0003         | -11.2283 |
| XSBN, CY2; CY1, ML       | -0.0060 | 0.0010         | -5.8577  |
| LC, CY1; CY2, PE         | -0.0037 | 0.0007         | -5.1294  |
| LC, CY1; CY2, ML         | -0.0049 | 0.0007         | -7.1258  |
| LC, CY2; CY1, PE         | -0.0040 | 0.0004         | -9.0437  |
| LC, CY2; CY1, ML         | -0.0041 | 0.0006         | -6.4494  |

Note: We performed f4-statistics (A, B; C, D) on all populations. Listed negative f4-score and Z-score less than -3 or positive f4-score and Z-score greater than 3.
